# Supplementary material for: Urban green spaces and cancer: a protocol for a scoping review
Source: PubMed Central journal article supplement — BMJ Open. 2018 Feb 16;8(2):e018851. doi: 10.1136/bmjopen-2017-018851 (PMC5829814; doi:10.1136/bmjopen-2017-018851), 2018-02-16
Supplement: bmjopen-2017-018851supp001.pdf [file bmjopen-2017-018851supp001.pdf]

## Search terms for Medline (Pubmed)

### **# Search**

1. neoplasms[Mesh]
2. neoplasm\*[Title/Abstract]) OR cancer[Title/Abstract])
3. carcinoma[Mesh]
4. carcinoma[Title/Abstract]) OR oncolog\*[Title/Abstract]) OR carcinogenic[Title/Abstract])
5. 1 OR 2 OR 3 OR 4
6. urban health[Mesh]
7. urban[Title/Abstract]) OR urban health[Title/Abstract]) OR urban green\*[Title/Abstract]) OR green open space\*[Title/Abstract]) OR public[Title/Abstract]) OR city[Title/Abstract]) OR cities[Title/Abstract]) OR urban area\*[Title/Abstract]) OR urban green area\*[Title/Abstract]) OR recreation area\*[Title/Abstract])
8. parks, recreational[Mesh]
9. recreation park\*[Title/Abstract]) OR playground\*[Title/Abstract]) OR urban nature[Title/Abstract]) OR urban design[Title/Abstract]) OR urbanity[Title/Abstract]) OR neighbourhood[Title/Abstract]) OR neighborhood[Title/Abstract]) OR residential[Title/Abstract]) OR municipal park\*[Title/Abstract])
10. 6 OR 7 OR 8 OR 9
11. Green space\*[Title/Abstract]) OR greenspace\*[Title/Abstract]) OR green-space\*[Title/Abstract]) OR greenery[Title/Abstract]) OR greenness[Title/Abstract]) OR green area\*[Title/Abstract]) OR natural space\*[Title/Abstract]) OR natural environment\*[Title/Abstract]) OR natural infrastructure\*[Title/Abstract]) OR garden\*[Title/Abstract]) OR square\*[Title/Abstract]) OR lawn\*[Title/Abstract]) OR green\* environment\*[Title/Abstract]) OR greenbelt\*[Title/Abstract]) OR greenway\*[Title/Abstract]) OR forestry\*[Title/Abstract]) OR green roof\*[Title/Abstract]) OR green wall\*[Title/Abstract]) OR green corridor\*[Title/Abstract]) OR green street\*[Title/Abstract]) OR street tree\*[Title/Abstract]) OR nature playground\*[Title/Abstract]) OR park\*[Title/Abstract]) OR green screen\*[Title/Abstract]) OR forest therapy[Title/Abstract])
12. 5 AND 10 AND 11
13. Limit 12 to Humans
